# Supplementary material
Source: PubMed Central journal article supplement (PMC10127521)
Supplement: NIHMS1887622-supplement-Supplementary_Material.pdf [file NIHMS1887622-supplement-Supplementary_Material.pdf]

Supplemental Table 1

*Overview of E-CRI Impairment Ratings*

---

|                        |                                                                                                                                                                                                                                                                                                                                                                                                                                                                                                                |
|------------------------|----------------------------------------------------------------------------------------------------------------------------------------------------------------------------------------------------------------------------------------------------------------------------------------------------------------------------------------------------------------------------------------------------------------------------------------------------------------------------------------------------------------|
| 0: No Impairment       | Child is able to engage in predominantly harmonious relationships and age expectable activities/ routines.<br><b>Exemplars:</b> “ <i>very cooperative in public; easy going with peers</i> ”                                                                                                                                                                                                                                                                                                                   |
| 1: Minimal Impairment  | Child is able to engage in predominantly harmonious relationships and age expectable activities and routines with minor or occasional irritability-related disruptions in functioning. Disruptions are transient manner and/or occur in developmentally-expectable contexts.<br><b>Exemplars:</b> “ <i>gets irritable if very tired and have to leave somewhere; grumpiness interferes with sibling on occasion</i> ”                                                                                          |
| 2: Moderate Impairment | Irritability causes notable impairment in ability to engage in predominantly harmonious relationships and/or age expectable activities and routines. At this level, irritability actively interferes with functioning. Disruptions are moderately intense, prolonged and/or frequent. Impairment in functioning is noted as problematic but not completely predominant.<br><b>Exemplars:</b> “ <i>his tantrums make me stressed and anxious;</i> ” “ <i>tantrums at times of transition slow things down</i> ” |
| 3: Severe Impairment   | Irritability leads to complete or almost complete inability to engage in predominantly harmonious and/or age expectable activities and routine. Child is very functionally impaired and these impairments are pervasive.<br><b>Exemplars:</b> “ <i>Bedtime is always interrupted due to irritable mood;</i> ” “ <i>screams, whines &amp; kicks when doesn’t get her way.</i> ”                                                                                                                                 |

---

## E-CRI Introduction

The interview was introduced to families as follows:

*“We are interested in how young children learn to manage their emotions. Learning how to manage emotions is one of the biggest “jobs” that young children have because they are just discovering the world. As children learn to do new things, act independently, and discover that they can’t always have their way, this can lead to strong reactions. These types of angry or frustrated outbursts some families call “tantrums,” “fits,” “meltdowns,” or “acting out...” and are different for every child. As young children test out their growing independence, they may also get moody (including grumpy, grouchy, cranky, or “showing attitude”). We want to learn about how your child manages his/her angry or irritable moods and behaviors...”*

Supplemental Table 2  
*E-CRI Impairment Rating Descriptives Across Samples*

|                                                | EmoGrow        |                |               |             |       | W2W            |                |               |             |       | Chi-square | p      |
|------------------------------------------------|----------------|----------------|---------------|-------------|-------|----------------|----------------|---------------|-------------|-------|------------|--------|
|                                                | 0              | 1              | 2             | 3           | M     | 0              | 1              | 2             | 3           | M     |            |        |
| Tantrums: Home Life                            | 2.6%<br>(4)    | 62.9%<br>(95)  | 31.1%<br>(47) | 3.3%<br>(5) | 1.351 | 35.8%<br>(118) | 47.0%<br>(155) | 16.1%<br>(53) | 1.2%<br>(4) | 0.827 | 63.59      | <.0001 |
| Moods: Home Life                               | 8.6%<br>(13)   | 67.5%<br>(102) | 21.2%<br>(32) | 2.6%<br>(4) | 1.179 | 30.9%<br>(102) | 51.8%<br>(171) | 16.4%<br>(54) | 0.9%<br>(3) | 0.873 | 29.57      | <.0001 |
| Tantrums: Out and About                        | 39.1%<br>(59)  | 48.3%<br>(73)  | 9.9%<br>(15)  | 2.6%<br>(4) | 0.762 | 64.4%<br>(212) | 27.7%<br>(91)  | 6.7%<br>(22)  | 1.2%<br>(4) | 0.447 | 27.45      | <.0001 |
| Moods: Out and About                           | 43.7%<br>(66)  | 49.7%<br>(75)  | 6.0%<br>(9)   | 0.7%<br>(1) | 0.636 | 59.0%<br>(194) | 32.5%<br>(107) | 8.2%<br>(27)  | 0.3%<br>(1) | 0.498 | 13.49      | .0037  |
| Tantrums: Relationships with siblings          | 9.1%<br>(12)   | 59.1%<br>(78)  | 28.8%<br>(38) | 3.0%<br>(4) | 1.258 | 59.9%<br>(100) | 35.9%<br>(60)  | 3.0%<br>(5)   | 1.2%<br>(2) | 0.455 | 94.68      | <.0001 |
| Moods: Relationships with siblings             | 34.8%<br>(46)  | 48.5%<br>(64)  | 15.2%<br>(20) | 1.5%<br>(2) | 0.833 | 62.3%<br>(104) | 34.1%<br>(57)  | 3.0%<br>(5)   | 0.6%<br>(1) | 0.419 | 28.46      | <.0001 |
| Tantrums: Relationships with peers             | 57.6%<br>(87)  | 35.8%<br>(54)  | 6.0%<br>(9)   | 0.7%<br>(1) | 0.497 | 85.8%<br>(272) | 11.7%<br>(37)  | 2.2%<br>(7)   | 0.3%<br>(1) | 0.170 | 45.62      | <.0001 |
| Moods: Relationships with peers                | 61.6%<br>(93)  | 33.1%<br>(50)  | 4.6%<br>(7)   | 0.7%<br>(1) | 0.444 | 85.8%<br>(272) | 12.6%<br>(40)  | 1.6%<br>(5)   | 0.0%<br>(0) | 0.158 | 35.86      | <.0001 |
| Tantrums: Relationships with nonparental/other | 56.3%<br>(85)  | 36.4%<br>(55)  | 6.0%<br>(9)   | 1.3%<br>(2) | 0.523 | 74.6%<br>(244) | 20.5%<br>(67)  | 4.3%<br>(14)  | 0.6%<br>(2) | 0.309 | 16.55      | .0009  |
| Moods: Relationships with nonparental/other    | 54.3%<br>(82)  | 35.8%<br>(54)  | 9.3%<br>(14)  | 0.7%<br>(1) | 0.563 | 72.5%<br>(237) | 22.9%<br>(75)  | 4.0%<br>(13)  | 0.6%<br>(2) | 0.327 | 16.54      | .0009  |
| Tantrums: Childcare/school life                | 78.8%<br>(108) | 17.5%<br>(24)  | 2.9%<br>(4)   | 0.7%<br>(1) | 0.255 | 75.8%<br>(113) | 21.5%<br>(32)  | 2.0%<br>(3)   | 0.7%<br>(1) | 0.275 | 0.90       | .8262  |
| Moods: Childcare/school life                   | 67.2%<br>(92)  | 27.0%<br>(37)  | 5.1%<br>(7)   | 0.7%<br>(1) | 0.394 | 77.2%<br>(115) | 19.5%<br>(29)  | 3.4%<br>(5)   | 0.0%<br>(0) | 0.262 | 4.36       | .2249  |

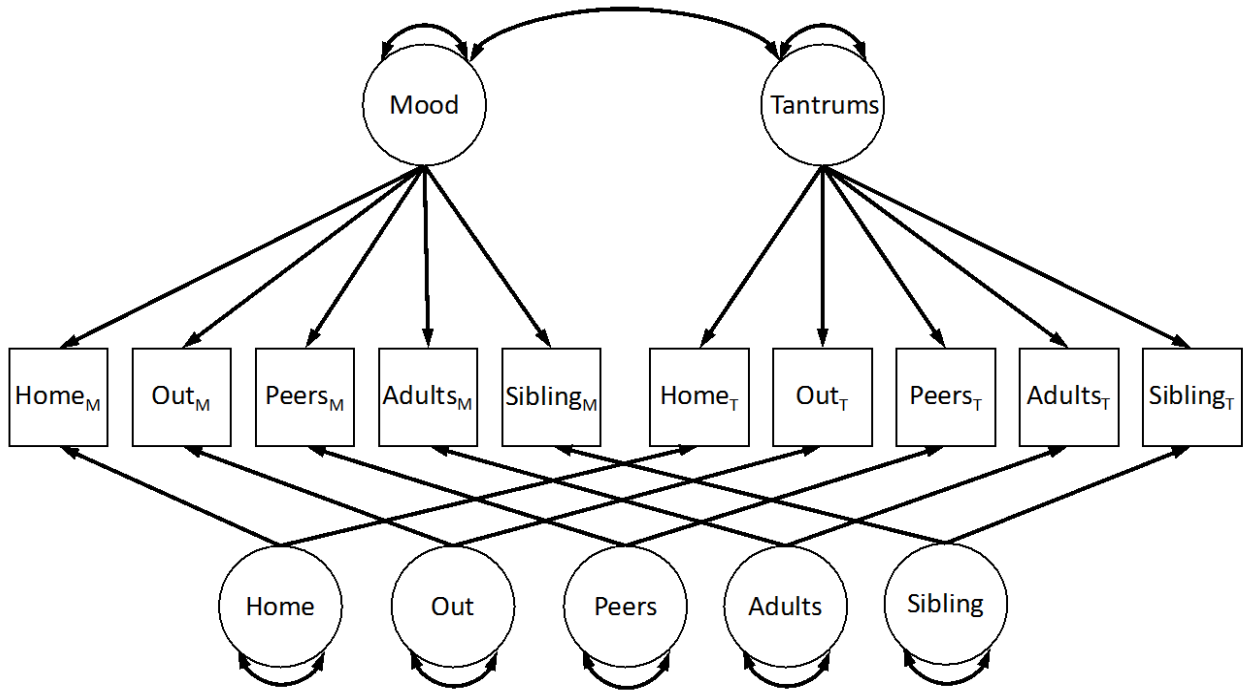

*Supplemental Figure 1. Path diagram for Multi-Trait Multi-Method E-CRI Structure*
